# Supplementary material for: p53‐independent Noxa induction by cisplatin is regulated by ATF3/ATF4 in head and neck squamous cell carcinoma cells
Source: PubMed Central journal article supplement (PMC5983129; doi:10.1002/1878-0261.12172), 2018-04-17

**Figure S1**

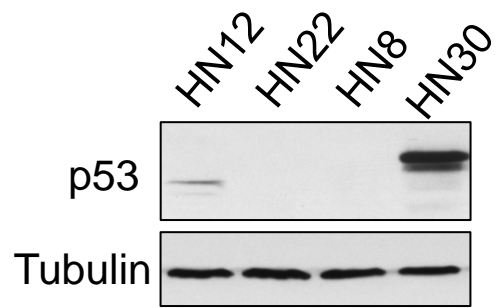



**Figure S3**

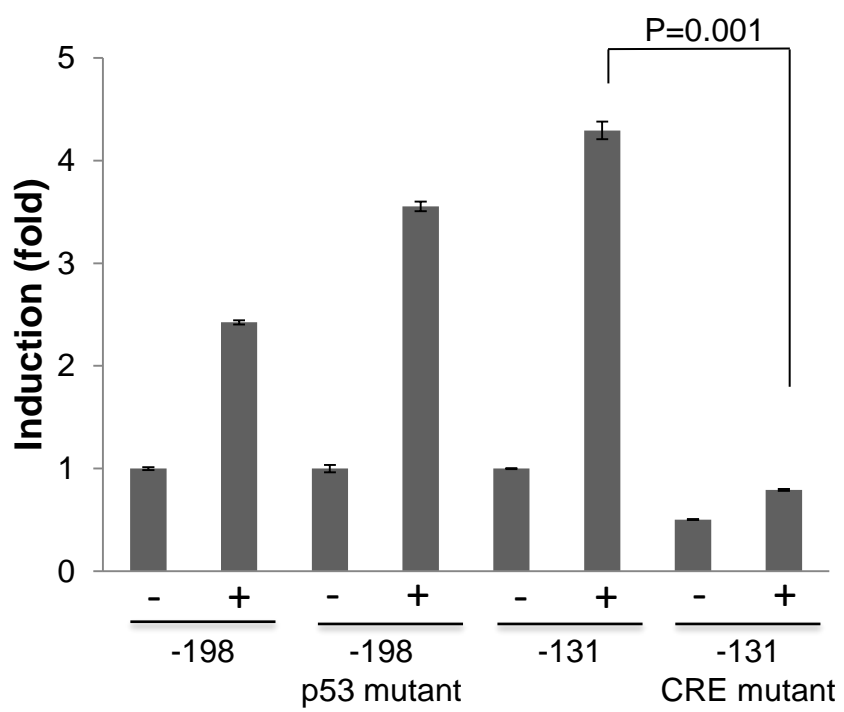

**Figure S4**

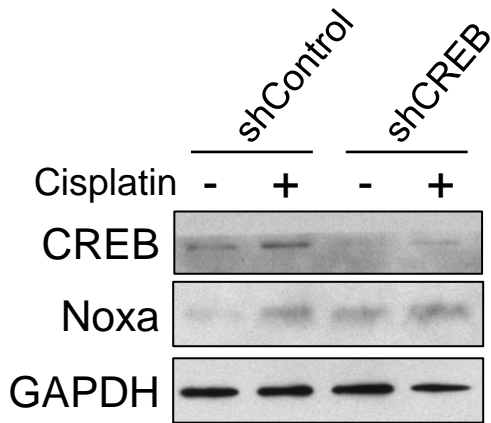

**Figure S5**

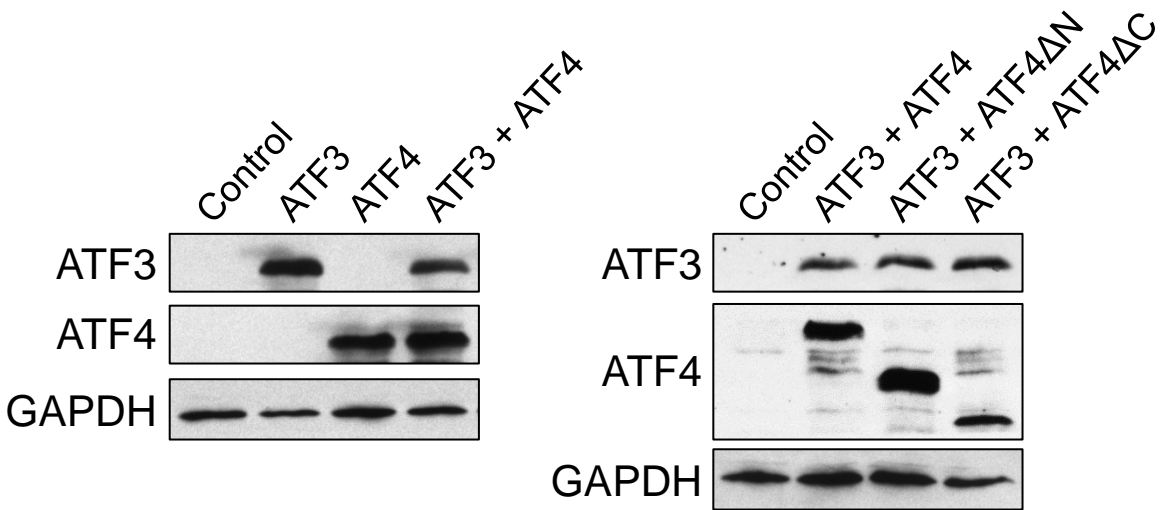

Supplement: MOL2-12-788-s001.pdf [file MOL2-12-788-s001.pdf]
